# Supplementary material
Source: PubMed Central journal article supplement (PMC7965092)
Supplement: 3193_tables.pdf [file 3193_tables.pdf]

**On-line Table 1: Patient clinical presentation and angiographic findings**

| Patient No. | Age (yr)/ Sex | Clinical Presentation                                       | Location                | Arterial Supply                          |                                                                        | Venous Drainage                                                                                           |                |       |
|-------------|---------------|-------------------------------------------------------------|-------------------------|------------------------------------------|------------------------------------------------------------------------|-----------------------------------------------------------------------------------------------------------|----------------|-------|
|             |               |                                                             |                         | ICA                                      | ECA                                                                    | Pattern                                                                                                   | Cortical Veins | Varix |
| 1           | 60/F          | Chemosis, proptosis, retro-orbital pain, tinnitus           | R greater sphenoid wing | ILT, MHT, Recur meningeal branch of OphA | MMA anterior branch, AMA, foramen rotundum artery                      | R SpBS, SMCV, R CS, bilateral IPS, R SOV                                                                  | No             | Yes   |
| 2           | 78/M          | Temporal lobe hematoma                                      | L greater sphenoid wing | ILT, Recur meningeal branch of OphA      | MMA anterior branch                                                    | L SpBS, SMCV, deep Sylvian vein, vein of Labbe, cortical vein                                             | Yes            | Yes   |
| 3           | 37/F          | Bruit, proptosis, tinnitus, retro-orbital pain              | L greater sphenoid wing | None                                     | MMA petrosal branch                                                    | L SpBS, L CS, L SOV                                                                                       | No             | Yes   |
| 4           | 54/M          | Chemosis, deterioration of vision, proptosis                | L greater sphenoid wing | None                                     | MMA petrosal branch                                                    | L SpBS, L CS, L SOV                                                                                       | No             | Yes   |
| 5           | 62/M          | Homonymous hemianopsia                                      | L greater sphenoid wing | ILT, MHT, Recur meningeal branch of OphA | MMA anterior branch, AMA, foramen rotundum artery                      | L laterocavernous sinus, basal vein of Rosenthal, vein of Galen; SMCV, Sylvian vein, vein of Trolard, SSS | Yes            | Yes   |
| 6           | 29/F          | Recurrent chemosis, headache, proptosis, retro-orbital pain | L greater sphenoid wing | Recur meningeal branch of OphA           | MMA anterior branch, middle temporal artery, anterior auricular artery | L SpBS, L CS, L SOV; SMCV, cortical vein                                                                  | Yes            | Yes   |
| 7           | 77/F          | Incidental lesion; history of MVA                           | L lesser sphenoid wing  | None                                     | MMA anterior branch                                                    | L lesser wing sinus, meningeal vein, SSS                                                                  | No             | No    |
| 8           | 60/F          | Bruit, chemosis, proptosis, ptosis                          | R lesser sphenoid wing  | ILT, Recur meningeal branch of OphA      | MMA anterior branch                                                    | R lesser wing sinus, R CS, bilateral IPS, R SOV                                                           | No             | No    |
| 9           | 48/M          | Bruit, tinnitus; history of MVA                             | L lesser sphenoid wing  | None                                     | MMA anterior branch                                                    | L lesser wing sinus, pterygoid plexus, L deep facial vein                                                 | No             | No    |
| 10          | 46/M          | Chemosis, proptosis; history of MVA                         | R lesser sphenoid wing  | ILT                                      | MMA anterior branch                                                    | R lesser wing sinus, R CS, R SOV                                                                          | No             | No    |
| 11          | 66/M          | Deterioration of vision                                     | R lesser sphenoid wing  | ILT, Recur meningeal branch of OphA      | MMA anterior branch, AMA, foramen rotundum artery                      | R SMCV, vein of Labbe, R transverse sinus; vein of Trolard, SSS                                           | Yes            | Yes   |

**Note:**—AMA indicates accessory meningeal artery; CS, cavernous sinus; ILT, inferolateral trunk; IPS, inferior petrosal sinus; L, left; MHT, meningohypophyseal trunk; MVA, motor vehicle crash; OphA, ophthalmic artery; R, right; Recur, recurrent; SpBS, sphenobasal sinus; SSS, superior sagittal sinus.

**On-line Table 2: Treatment and anatomic clinical outcomes**

| Patient No. | Endovascular Treatment                                                                                    | Surgical Treatment                                                                                                   | Year of Treatment | Complications                         | Angiographic Results                      | Angiographic Follow-Up     | Clinical Outcome          |
|-------------|-----------------------------------------------------------------------------------------------------------|----------------------------------------------------------------------------------------------------------------------|-------------------|---------------------------------------|-------------------------------------------|----------------------------|---------------------------|
| 1           | TVE from the IPS, Matrix coils and Onyx 18; TAE from the R MMA, Onyx 18                                   | None                                                                                                                 | 2010              | Asymptomatic stretched coil retention | Anatomic cure                             | No follow-up               | Cure, 6 months follow-up  |
| 2           | TAE from the L MMA; Onyx 18                                                                               | None                                                                                                                 | 2008              | None                                  | Anatomic cure                             | No recurrence at 3 months  | Cure, 9 months follow-up  |
| 3           | TAE from the L MMA; GDC, Onyx 34, Onyx 18                                                                 | None                                                                                                                 | 2007              | None                                  | Anatomic cure                             | No recurrence at 5 months  | Cure, 8 months follow-up  |
| 4           | TAE from the L MMA; Onyx 34                                                                               | None                                                                                                                 | 2006              | None                                  | Anatomic cure                             | No recurrence at 21 months | Cure, 21 months follow-up |
| 5           | TVE from the vein of Galen, GDCs; TAE from the L MMA, 33% <i>n</i> -BCA                                   | None                                                                                                                 | 2000              | None                                  | Anatomic cure                             | No follow-up               | No follow-up              |
| 6           | TAE from the L MMA, fiber coils; TAE from the L middle temporal and anterior auricular, 33% <i>n</i> -BCA | Pterional craniotomy; disconnection of cortical vein and resection of the lesion                                     | 1993              | None                                  | Anatomic cure, intraoperative angiography | No recurrence at 12 months | Cure, 2 years follow-up   |
| 7           | TAE from the L MMA; Onyx 18                                                                               | None                                                                                                                 | 2009              | None                                  | Anatomic cure                             | No follow-up               | Cure, 14 months follow-up |
| 8           | TVE from the facial vein; pushable coils                                                                  | None                                                                                                                 | 2001              | None                                  | Anatomic cure                             | No recurrence at 7 years   | Cure, 7 years follow-up   |
| 9           | TAE from the L MMA; 33% <i>n</i> -BCA                                                                     | None                                                                                                                 | 2000              | None                                  | Anatomic cure                             | No recurrence at 6 years   | Cure, 6 years follow-up   |
| 10          | TAE from the R MMA, microcoils and 33% <i>n</i> -BCA; TVE from the facial vein, microcoils and GDCs       | None                                                                                                                 | 1995              | None                                  | Anatomic cure                             | No recurrence at 4 months  | Cure, 4 months follow-up  |
| 11          | TAE from the R ILT, GDCs; TAE from the R MMA, 33% <i>n</i> -BCA                                           | Pterional craniotomy; disconnection of cortical veins, resection of the lesion, and decompression of the optic nerve | 1993              | None                                  | Anatomic cure, intraoperative angiography | No recurrence at 18 months | Cure, 15 years follow-up  |

**Note:**—ILT indicates inferolateral trunk; IPS, inferior petrosal sinus; L, left; R, right; TAE, transarterial embolization; TVE, transvenous embolization.
